## A simplified spiking model of grid-cell scale and intrinsic frequencies

Diogo Santos-Pata<sup>a,c</sup>, Riccardo Zucca<sup>a</sup>, Héctor López-Carral<sup>a</sup>, Paul F. M. J. Verschure<sup>a,b,c,\*</sup>

<sup>a</sup>*Institute for Bioengineering of Catalonia (IBEC),*

*Barcelona Institute of Science and Technology (BIST), Barcelona, Spain*

<sup>b</sup>*Institució Catalana de Recerca i Estudis Avançats (ICREA), Barcelona, Spain*

<sup>c</sup>*Universitat Pompeu Fabra (UPF), Barcelona, Spain*

---

### Abstract

The hexagonal tessellation pattern of grid cells scales up progressively along the dorsal-to-ventral axis of the medial entorhinal cortex (MEC) layer II. This scaling gradient has been hypothesized to originate either from inter-population synaptic dynamics as postulated by attractor networks, from projected theta frequencies to different axis levels, as in oscillatory models, or from cellular dynamics dependent on hyperpolarization-activated cation currents. To test the hypothesis that intrinsic cellular properties account for the scale gradient as well as the different oscillatory frequencies observed along the dorsal-to-ventral axis, we have modeled and analyzed data from a population of grid cells simulated with spiking neurons interacting through low-dimensional attractor dynamics. To investigate the causal relationship between oscillatory frequencies and grid scale increase, we analyzed the dominant frequencies of the membrane potential for cells with distinct after-spike dynamics. We observed that intrinsic neuronal membrane properties of simulated cells could induce an increase of grid scale when modulated by after-spike reset values. Differences in the membrane potential oscillatory frequency were observed along the simulated dorsal-to-ventral axis, suggesting that, rather than driving to the increase of grid scale as proposed by interference models of grid cells, they are the result of intrinsic cellular properties of neurons at each axis level. Overall, our results suggest that the after-spike

---

\*Corresponding author

*Email address:* [pverschure@ibecbarcelona.eu](mailto:pverschure@ibecbarcelona.eu) (Paul F. M. J. Verschure)

dynamics of cation currents may play a major role in determining the grid cells' scale and that oscillatory frequencies are a consequence of intrinsic cellular properties that are specific to different levels of the dorsal-to-ventral axis in the MEC layer II.

*Keywords:* grid cells, entorhinal, hyperpolarization, space

---

## 1. Introduction

Grid cells found in layer II of the medial entorhinal cortex (MEC) present multiple regularly-spaced firing fields organized in a triangular tessellation that spans the entire explored environment [1, 2]. Functionally, grid cells represent a spatial metric system signaling the position of the animal in the environment. Together with sensory cells in the lateral entorhinal cortex (LEC), grid cells in MEC layer II project to both the dentate gyrus (DG) and CA3 neurons of the hippocampus proper [3, 4]. Thus, the mammalian hippocampus robustly encodes spatial representation using a combination of environment-related spatial and sensory information.

Since the discovery of grid cells, several computational models have been proposed to describe the spatial and temporal properties of grid fields' formation. Most of the proposed models can be categorized into two groups: oscillatory interference [5] and attractor dynamics [6, 7]. For the former group, the hexagonal grid pattern emerges from the interaction of multiple phase-synchronized oscillations that are based on the animal's speed vector projected to MEC layer II from earlier MEC layers. Thus, at the computational level, manipulating the amplitudes and phase differences of these oscillations would modulate the scale of the resulting grid cells. On the other hand, in the attractor-based models, the distribution of synaptic weights within an all-to-all network creates a characteristic "bump" of activity that converges to stable attractor points.

The network weights configuration is updated according to the spatial motion of the agent at every time ( $t$ ), which allows for the characteristic periodic firing across the explored environment. Recent studies on the intrinsic cellular properties of grid cells support the idea of low-dimensional continuous attractor dynamics in the grid cells' system, favoring the computational principles of attractor-based models of grid cells [8, 9].

The size and spacing of grid cells' firing fields have been shown to increase progressively along the dorsal-to-ventral axis of the MEC [1, 10, 11]. Func-

tionally, such a scale gradient has been suggested to operate as an accurate path-integration mechanism projecting to the DG and CA3 hippocampal sub-regions [10]. Moreover, the interaction between grid scales and other spatially tuned cells have been suggested to serve for minimizing errors in path integration [12].

Despite observations on hyperpolarization-activated cyclic nucleotide-gated (HCN) channels' disruption and its effects on grid scale [13], the mechanism underlying the differences in scale of such neural populations is still not clear. Different sub-threshold theta oscillatory frequencies have been measured in vitro in neurons along the dorsal-to-ventral axis, suggesting that individual cells' intrinsic frequencies might play a key role on grid cells' scale [14]. Moreover, it has been shown that the distance from the dorsal surface is accompanied by a decrease in oscillatory frequency in MEC layer II [15].

From the continuous attractor model perspective, different scales are often obtained by manipulating the variance of the Gaussian synaptic distributions. However, given recent insight on the effects of HCN channels disruption in grid cells' metrics, the distribution of synaptic weights might not be the main factor accounting for grid scale and stability of the network activity.

Coherent with such idea, previous computational models of grid cells [16] have explicitly pointed out that differences in grid cells' scale along the dorsal-to-ventral axis are linked to differences in the cells' intrinsic frequencies.

Indeed, a systematic topographical change in time constants of hyperpolarization-activated cation currents ( $I_h$ ) of stellate cells has been observed in vitro [14]. Moreover, those topographical changes correlate with membrane potential oscillation frequency and differences in the time constant of the sag response.

This suggests that different  $I_h$  kinetics, which are regulated by the HCN family proteins, may play a critical role in the change of oscillatory frequencies along the dorsal-to-ventral axis and the topographical expansion of grid scale [15]. Forebrain-specific knockout of the HCN1 subcomponent in mice has been shown to selectively affect the Y-intercept of the grid scale, indicating that those elements of the HCN family are involved in grid scale modulation [13, 17].

Previous studies have addressed the question of how intrinsic cell's frequency affects the grid scale along the dorsal-to-ventral axis [18]. Specifically, they proposed a model where the addition of physiologically plausible after-spike dynamics modulates the observed increase in grid scale along the dorsal-ventral axis of MEC.

Whether the membrane potential oscillatory frequency is sufficient to

69 determine the grid scale is still unclear. In attractor models of grid cells'  
70 formation, the scale of the grid is modulated by a gain parameter affecting  
71 the synaptic connectivity of the network and thus the speed at which the  
72 activity bump moves along the network as well [18, 19]. However, there is no  
73 biological evidence for such connectivity matrix discretization. In interfer-  
74 ence models, the differences in grid scale are generated due to amplitude and  
75 phase changes in the oscillatory inputs to the grid cells network. Despite the  
76 fact that differences in the oscillatory frequencies are observable in biological  
77 systems, it is not clear whether it emerges from intrinsic or extrinsic network  
78 dynamics. The fact that knocking out HCN family type genes disrupts the  
79 normal progressive scale increase raises the question as to whether such scale  
80 gradient is a network or a cellular property. We address this by presenting a  
81 simplified spiking computational model that describes the generation of the  
82 spatial and temporal properties of grid cells found in physiological studies.

## 83 2. Materials and methods

84 In order to explore the effects of intrinsic cellular properties on differences  
85 in spatial grid scale found in the dorsal-to-ventral axis of MEC layer II and the  
86 impact on the oscillatory frequency at each axis level, we created a simulated  
87 environment where a virtual agent was randomly exploring either a 1D linear  
88 track or a 2D square arena (see Fig. 1). In both environments, the agent's  
89 speed vector was fed into an ensemble of simulated neuronal populations  
90 (described below). Keeping in line with the findings from Yoon et al. [9]  
91 regarding the evidence of low-continuous attractor dynamics in grid cells'  
92 populations, we built on elements of a previously presented grid cells model  
93 based on attractor dynamics [19] and translated it to a spiking neuronal  
94 model, approximating the spiking behavior of MEC layer II stellate cells. At  
95 the topological level, the network is based on the twisted toroidal architecture  
96 and synaptic weights are dependent on the Cartesian distance of each cell  
97 to its postsynaptic cells and updated according to the speed vector of the  
98 simulated agent moving within the virtual environment (see [19] for more  
99 details).

100 A total of 19 populations of grid cells were created, each containing  
101 100 neurons connected in an all-to-all fashion (Fig. 1A). The model was  
102 implemented in the NEST neural networks simulator [20], and all the analy-  
103 ses were done using the SciPy python scientific library [21]. The simulations  
104 used the simplified Izhikevich's spiking model [22], which allows for the direct

105 manipulation of the resonant properties affected by HCN channels in biolog-  
106 ical stellate cells [13] through a single parameter. In the model, parameters  
107 were tuned to reproduce the bursting behavior of MEC layer II grid cells ob-  
108 served experimentally in stellate cells recordings [22, 23, 24]. The activation  
109 function of each neuron in the network was defined by a system of ordinary  
110 differential equations given by:

$$dv/dt = 0.04v^2 + 5v + 140 - u + I \quad (1)$$

$$du/dt = a(bv - u) \quad (2)$$

111 where  $0.04v^2 + 5v + 140$  mimics the spike initiation dynamics of a neuron,  
112  $I$  represents synaptic currents or injected DC-currents,  $v$  represents the cell's  
113 membrane potential and  $u$  describes the membrane recovery variable.  $a$  de-  
114 scribes the time scale of the recovery variable  $u$  and  $b$  describes the sensitivity  
115 of the recovery variable  $u$  to the subthreshold fluctuations of the membrane  
116 potential  $v$ .

117 The after-spike resetting mechanism is given by:

$$\text{if } v > 30 \text{ mV, then } \{ v \leftarrow cu \leftarrow u + d \quad (3)$$

118 where  $c$  and  $d$  describe the after-spike membrane value and recovery vari-  
119 able, respectively.

120 To test whether the modulation of HCN channels is sufficient to trigger  
121 changes in grid cells' scale, the after-spike reset value of cation currents  $d$   
122 was varied across populations in the range 0.2 - 3.8 mV/ms with linearly  
123 increasing steps (Fig. 1B). The parametric space was defined in order to  
124 maintain the spiking behavior of stellate cells (Fig. 1C-D). All the other  
125 model parameters were kept constant over all the neuronal populations.

126 The parameter  $a$ , which describes the cell's current recovery variable time  
127 scale, was set to 0.03. The parameter  $b$ , describing the cell's current recovery,  
128 was set to 0.2. The parameter  $c$ , describing the after-spike reset value of the  
129 cell's membrane potential, was set to -50 mV. The spike train activity of each  
130 cell was recorded and used for the subsequent analysis.

131 The virtual agent's method of exploration was set to exhibit two different  
132 behaviors depending on the environment. In order to analyze differences in  
133 periodicity and size of grid cells' firing fields for populations with different  
134  $I_h$  currents, the first behavior of the agent was to run back-and-forth in a

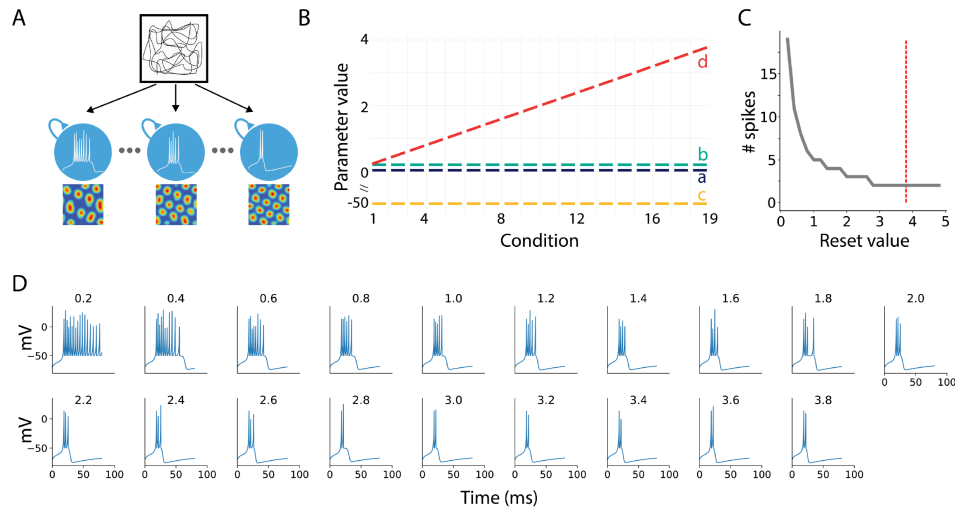

Figure 1: **Illustrative description of the methods used in this study.** **A.** A virtual agent is set to randomly explore a squared virtual arena. During exploration, 19 populations of grid cells are activated and all receive inputs from the vestibular system encoding the speed vector of the virtual agent. Each population of grid cells was initialized with specific cell model parameters as shown in B. The spatial rate map of each cell belonging to each population was stored for further analysis. **B.** Izhikevich model parameters used per each population (condition). Every parameter value was kept constant for every population, with the exception of the  $d$  parameter ranging from 0.2 to 3.8 in steps of 0.2. **C.** Number of spikes as a function of the  $d$  parameter. With all the other cell's parameters maintained constant a plateau is observed for reset values larger than 3. **D.** Simulations of hippocampal stellate neurons for the 19 populations included in the model by varying the  $d$  parameter.

135 linear track environment. For the second environment, the square arena, the  
 136 agent would explore the arena randomly. Thus, in the second environment,  
 137 the characteristic 2D rate maps of grid cells can be depicted.

138 Grid cell's activity was initialized with random activity between 0 and  
 139  $1/N$  (number of neurons in each grid-cell module) and was modulated by  
 140 the speed vector of the agent's translation at each time step.

141 The network's input is reliant on the speed vector of the simulated agent's  
 142 exploration,  $s := (s_x, s_y)$ , allowing the activity bump of the network shifts  
 143 along the neural sheet when the agent moves according to its speed vector.  
 144 Whereas in the original grid cell model proposed by [19] the speed vector  $s$   
 145 is susceptible of modulation via a gain parameter, affecting the grid scale, in

146 our simulations, the speed vector was kept constant throughout the simulated  
147 conditions.

148 The synaptic weights distribution was defined as:

$$w_{ij}(t) = I * \exp\left(-\frac{\|c_i - c_j + s(t)\|_{tri}^2}{\sigma^2}\right) - T \quad (4)$$

149 where  $\|c_i - c_j\|_{tri}^2$  denotes the Cartesian distance between cells  $c_i$  and  $c_j$   
150 in the network matrix,  $I$  ( $= 0.3$ ) defines the synaptic strength,  $\sigma$  ( $= 0.48$ )  
151 modulates the width of the synaptic weight distribution and  $T$  ( $= 0.05$ ) is  
152 the excitatory and inhibitory distance threshold.

### 153 2.1. Data analysis

154 Occupancy maps were calculated as the total time an agent spent in  
155 each spatial bin ( $50 \times 50$  pixels) within the virtual arena. Rate maps were  
156 then obtained by normalizing each cell's spiking activity within a spatial bin  
157 with the agent's occupancy map. Autocorrelograms were then obtained by  
158 the spatial autocorrelation of the rate map of each cell in the 2-dimensional  
159 plane.

160 Frequency analyses were obtained by averaging the dominant frequency  
161 provided by the power spectral density (PSD). To compute the dominant  
162 membrane potential oscillation frequency, continuous, contiguous and non-  
163 overlapping windows of 10 seconds were extracted from each cell membrane  
164 potential and their PSD was computed. The second highest peak of the  
165 averaged PSD was considered the dominant frequency for a given cell.

## 168 3. Results

169 To verify that the manipulation of the intrinsic cellular properties in the  
170 chosen cell model simulation would not affect the attractor mechanism of  
171 the networks, we set every simulation to be a random state of activity and  
172 visually ensured that an activation bump was formed and remained stable  
173 throughout the virtual agent navigation. The formation of the activity bump  
174 during the initial simulation steps for three representative populations with  
175 different after-spike reset values are shown in Fig. S1.

176 *3.1. Grid scale is modulated by  $I_h$*

177 *3.1.1. Linear track simulation*

178 The virtual agent was set to run along a linear track environment, mea-  
179 suring 200 virtual units, at a constant speed of 20 virtual units/second. A  
180 total of 1900 spike trains were recorded.

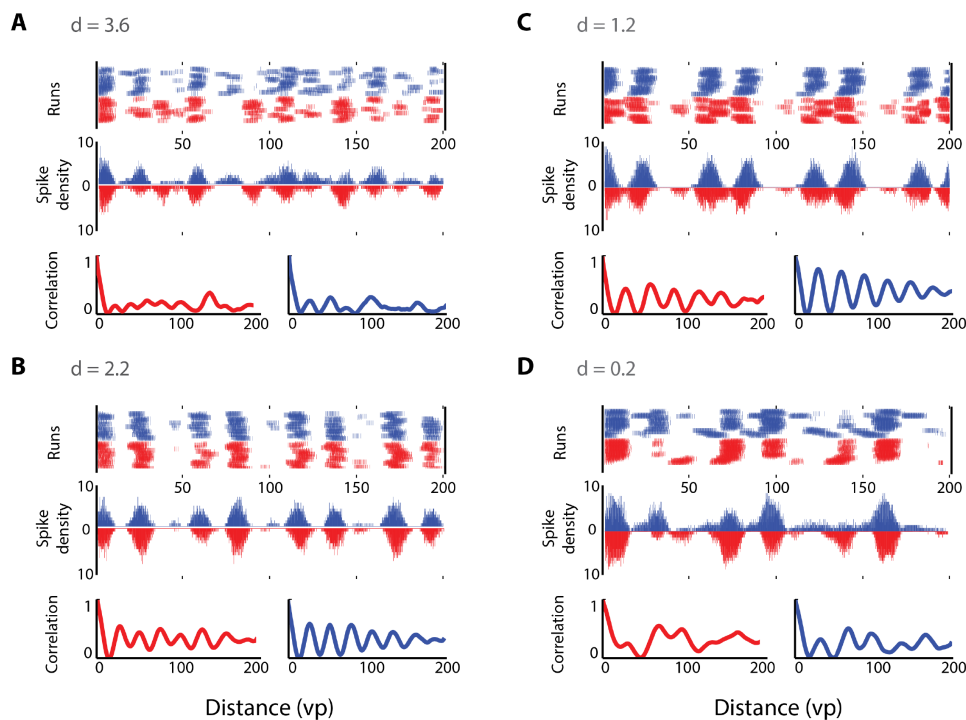

Figure 2: **Progressive increase in grid scale from dorsal to ventral MEC.** Spike-trains of four representative cells from dorsal (A) to ventral (D) axis populations. Left trajectories (red) and right trajectories (blue) are differentiated. Top subplots represent the raw spikes against the position of the linear track per each run. Middle subplots represent the spike density per position (same color code as in top plot). Bottom subplots show the correlations of spike density along the linear track. Higher to lower oscillation of spike density and correlation is observed from dorsal to ventral levels.

181 To test whether the modulation of HCN channels is sufficient to trigger  
182 changes in grid cells' scale, the after-spike reset values of cation currents  
183  $d$  were varied across populations. Fig. 2 illustrates the effects of varying



184 the after-spike dynamics on the firing fields of 4 representative cells from  
185 the simulated dorsal-to-ventral axis level conditions ( $d = 3.6, 2.2, 1.2, 0.2$ ).  
186 Within the linear track, spike activity relative to the agent's position in the  
187 environment points to an increase in firing-fields size and distance that is  
188 dependent on the value of  $d$ . The effect appears more evident from the  
189 spike density plots (Fig. 2 middle subplots) and by the periodic regions of  
190 high activity observed in the spike density autocorrelations (Fig. 2 bottom  
191 subplots).

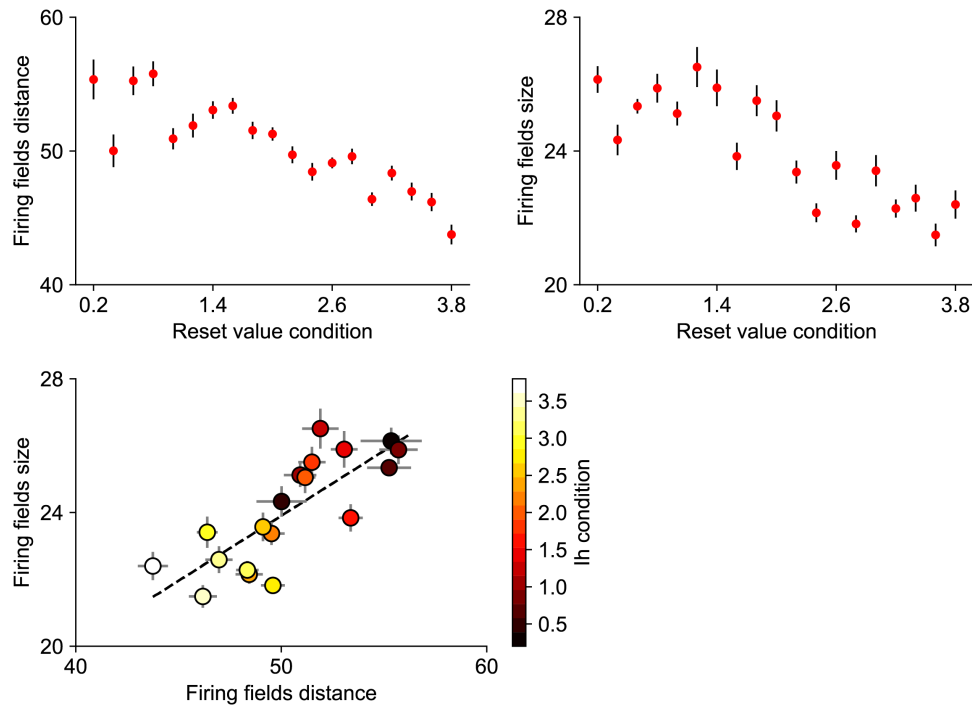

Figure 3: **Grid field sizes and spatial distance in simulations run with varying after-spike-reset values.** Top: Firing field distance (left) and size (right) decrease along the simulated conditions for larger  $d$ . Data points represent the average  $\pm$  SD of all cells in a simulated neuronal population.

192 To quantify the increase in grid scale at the population level, we have  
193 quantified each simulated cell firing field's size and distance (Fig. 3). To do so,  
194 we obtained the firing rate, spike count, at each position of the linear track as

195 in Fig. 2 (bin size = 5 virtual points). A peak detection algorithm was applied  
196 to identify the firing fields. Firing fields whose peak rate was larger than 1.2  
197 standard deviations (z-scored) were included in the sample and the averaged  
198 distance between consecutive fields of each cell was computed. Increasing the  
199 hyperpolarization reset value  $d$  caused a decrease in the averaged firing field  
200 distance (Pearson  $r = -0.34, p < 0.01$ , Fig. 3-top left). Similarly, in order to  
201 quantify each cell's firing field size, we obtained the spatial distance between  
202 the two firing rate points on each side of its peak whose first derivative was  
203  $\geq 0$ . As for distance, we found that firing fields size is negatively modulated  
204 by the after-spike reset parameter (Pearson  $r = -0.31, p < 0.01$ , Fig. 3-top  
205 right). We next asked whether firing fields size and distance were equally  
206 affected by the hyperpolarization reset value of each condition. To do so, we  
207 averaged firing fields size and distance of cells belonging to the same condition  
208 (Fig. 3-bottom). A strong correlation between size and distance revealed  
209 significance (Pearson  $r = 0.79, p < 0.01$ ). Moreover, the increase in these  
210 spatial measures was accompanied by a decrease in the hyperpolarization  
211 reset value (see  $I_h$  condition in Fig. 3-bottom, colorbar).

212 Further, we analyzed the relationship between the size and the distance  
213 of the firing fields of every cell used in our simulations with the hyperpo-  
214 larization reset value of each condition through a generalized linear model  
215 (GLM). According to the output, firing field size was modeled accordingly  
216 by:  $\text{logit}(\pi_i) = 5.3 - 0.1 * \text{size}$ , and  $\text{variance} = 0.019$ . Firing field dis-  
217 tance was modeled accordingly by:  $\text{logit}(\pi_i) = 6.6 - 0.07 * \text{distance}$ , and  
218  $\text{variance} = 0.012$ .

### 219 3.1.2. 2D arena simulation

220 With the linear track simulations, we have shown that the intrinsic prop-  
221 erties of grid cells can effectively modulate firing field size and spacing. How-  
222 ever, testing such grid cell properties in a linear trajectory could fail to  
223 demonstrate possible deformations in the characteristic grid pattern.

224 In order to observe the stereotypical pattern of grid cell and the accounts  
225 of after-spike hyperpolarization behavior in grid resolution, we have set the  
226 virtual agent to perform random exploration within a two-dimensional open  
227 field arena. Similar to the 1D runs, we recorded the membrane potentials of  
228 stellate cells belonging to different simulated dorsal-to-ventral axis levels. As  
229 expected, the firing properties of cells at the ventral level presented larger and  
230 further distributed firing-fields when compared with the ones at the dorsal  
231 level (Fig. 4)

232 In order to quantify the stability of our model in the grid cells' spatial  
233 representation, we used the gridness score measure for every cell's autocor-  
234 relogram using correlations of rotational symmetry [25], by comparing the  
235 spatial autocorrelation maps to the rotated versions of themselves with 30°  
236 rotations as:

$$G_S = \min(A_{corr60^\circ}, A_{corr120^\circ}) - \max(A_{corr30^\circ}, A_{corr90^\circ}, A_{corr150^\circ}) \quad (5)$$

237 Overall, rate maps along the simulated conditions revealed to be in the  
238 range of gridness scores observed in tessellation patterns activity ( $> 0.15$ ) and  
239 were not affected by the hyperpolarization reset value (Pearson  $r = 0.061$ ,  $p =$   
240  $0.23$ ), suggesting a stable spatial representation across the simulated dorsal-  
241 to-ventral axis.

242 In order to quantify for differences along dorsal-to-ventral levels, we have  
243 correlated membrane potentials of cells within each module. Lags calculated  
244 after correlating membrane potential signals were taken as a measure of the  
245 periodic increase in the amplitude of cells firing rate. Thus, high-resolution  
246 grid cell rate-maps at the dorsal level (smaller scale) should reveal shorter  
247 distances between firing fields and larger distances for the ones at the ven-  
248 tral level (larger scale). As expected, we observed a progressive decrease  
249 in membrane potential autocorrelations lags as a function of the after-spike  
250 parameter (Pearson  $r = -0.94$ ,  $p < 0.01$ , Fig. 5-right). As grid cell hexag-  
251 onal tessellation patterns and membrane potentials are not dissociable, we  
252 have also quantified spatial lags in between firing fields. As for membrane  
253 potentials, lags between spatial firing-fields were larger for smaller hyper-  
254 polarization reset values (Pearson  $r = -0.91$ ,  $p < 0.01$ , Fig. 5-left) as well  
255 as for rate maps spatial auto-correlation (Pearson  $r = -0.96$ ,  $p < 0.01$ ,  
256 Fig. 5-middle). Fig. S2 further illustrates pairwise distances between spatial  
257 observations.

258 Despite spatial grid-cell scale distribution found along the dorsal-to-ventral  
259 axis levels of MEC layer II, the oscillatory properties of stellate grid cells are  
260 also organized on the same axis [10, 18]. To verify whether the hyperpolar-  
261 ization behavior accounting for the spatial resolution organization was also  
262 sufficient to modulate the dominant frequencies of simulated neurons, we  
263 have compared dominant frequencies of cells at multiple dorsal-to-ventral  
264 axis modules. As in [10], dominant frequencies were observed to decrease  
265 from dorsal to ventral modules, ranging 14-22 Hz (Pearson  $r = 0.45$ ,  $p <$

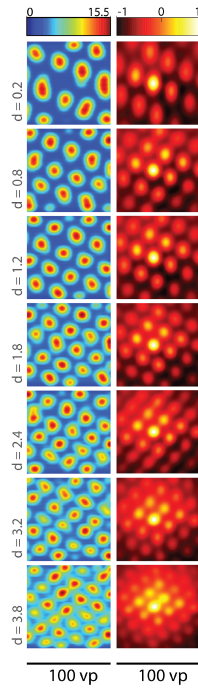

Figure 4: **Single cell's rate maps and autocorrelograms of neurons along dorsal-to-ventral axis.** Cell's spatial activity from ventral (top) to dorsal (bottom) axis level. Hyperpolarization-reset value represented by  $d$  at left most side. Progressively decrease of grid cell scale (left column), accompanied by its autocorrelogram (right column).

266 0.01, Fig. 6-left). Note that frequencies are not in a theta range as ex-  
267 pected in MEC, which could be due to the absence of inhibitory projec-  
268 tions either from within the MEC population or arriving from hippocampus  
269 proper feedback projections. However, there is evidence that modulation of  
270 hyperpolarization-after values is sufficient to explain a decrease of membrane  
271 potential frequency from dorsal to ventral levels. Thus, spatial scale and os-  
272 cillatory frequency might be explained by the intrinsic cell hyperpolarization  
273 mechanism.

## 274 Discussion

275 Grid cells in MEC layer II have been characterized by their grid scale,  
276 which progressively increases along the dorsal-to-ventral axis. So far, grid

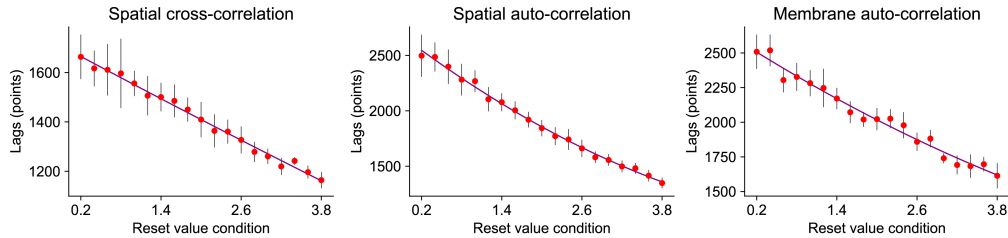

Figure 5: **Spatial correlation lags from spike-train and membrane potential along dorsal-to-ventral axis.** Lags of correlation along most ventral (0.2) to most dorsal (3.8) conditions. Left and middle plots represent lags of cross- and autocorrelation from 10 cells at each condition. Right plot represents the lags of autocorrelation for membrane potential of each cell. Increase of hyperpolarization-reset value is accompanied by the decrease of lags from ventral to dorsal axis locations.

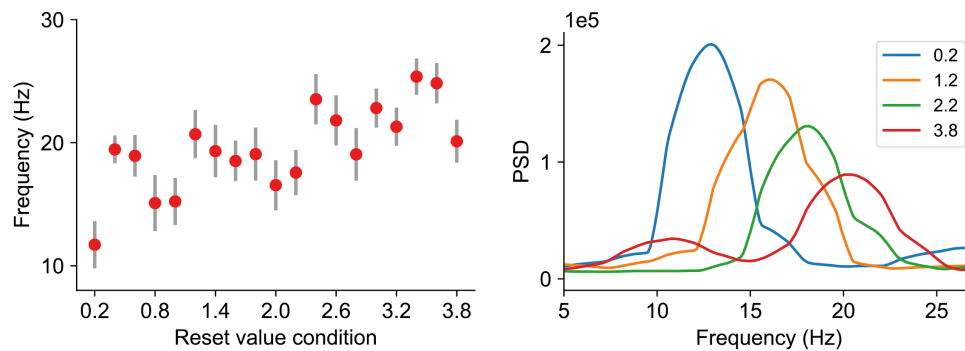

Figure 6: **Increase of dominant frequencies from ventral (left) to dorsal (right).**

277 cells' computational models either use oscillatory interference or attractor-  
278 based dynamics to elicit the desired behaviors. Hybrid models have also been  
279 presented [26]. Regardless, the mathematical formulation to modulate grid  
280 scale has been attributed to network dynamics, in the case of attractor-based  
281 models, and to network inputs, in the case of interference-based models. In-  
282 terference models affect its grid cell scale by modulating the frequency of  
283 oscillatory signals being projected to the ensemble of grid cells in the net-  
284 work [5]. Attractor dynamics-based grid cell models affect grid cells scale by  
285 modulating the gain parameter which reflects how fast the bump of activity

286 in the network is translated to neighbor cells [19]. Despite the fact that both  
287 categories of grid cell models use network parameters to affect grid cell scale,  
288 it is still unclear what is modulating grid cells' scale in the hippocampus.

289 Based on the findings by Giacomo et al. [14, 27], in this study, we hy-  
290 pothesized that grid cells' scale can be modulated exclusively through single  
291 cell properties instead of network properties. To test our hypothesis, we have  
292 built upon a previously presented model for grid cells formation based on at-  
293 tractors dynamics [19], as has recently been observed in such cell type [8, 9].  
294 We used spiking neurons to mimic the properties of stellate grid cells and  
295 thus modulate their hyperpolarization behavior. We found that after-spike-  
296 reset scalars are sufficient to affect both size and scale of grid cells at different  
297 axis levels in the medial entorhinal cortex layer II. Specifically, we observed  
298 changes in the firing fields' size and scale, and their respective autocorrela-  
299 tion periodicity bumps from different after-spike-reset values conditions for  
300 linear track simulations.

301 Contrary to Brun et al. [10], we found periodic activity events for the  
302 population vector activity analysis. Indeed, one should argue that grid cell  
303 periodicity must be noticed at the population level and, thus, whether such  
304 a phenomenon is accounted for in a living organism might depend on higher-  
305 level spatial encoding mechanisms such as environmental compartmentaliza-  
306 tion [28].

307 Because wild rodents typically navigate within two-dimensional environ-  
308 ments, we have also tested our library in a virtual agent moving in a 2D  
309 arena. As in the 1D environment, the agent had no spatial target position  
310 or goal and simply moved at random within the squared arena. Again, the  
311 attractor-based network was set to form grid cells as in Guanella et al. [19]  
312 using the Izhikevich neuron model [22] to mimic stellate cells found in MEC  
313 layer II. The only parameter differing among cells was the after-spike-reset  
314 values specific to each sub-population. As expected, size and scale of grid  
315 cells firing fields increased progressively along the simulated MEC layer II  
316 dorsal-to-ventral axis. In addition, 2D navigation simulations allow us to  
317 confirm that gridness remained stable and was not affected by hyperpolar-  
318 ization related properties. Linear decays along simulated conditions were  
319 observed for both spatial and membrane potential correlations lag, allowing  
320 the quantification of firing-fields distances.

321 In accordance with Brun et al. [10] and as hypothesized by Navratilova et al.  
322 [18], both oscillatory frequencies and spatial scale were affected by cellular  
323 after-spike-reset parameters, suggesting that biophysical mechanisms alone

324 are sufficient to modulate multiple grid cell properties.

325 The flexibility of the synaptic connections has been previously questioned  
326 and marked as an implausible mechanism to update the attractor activity  
327 bump in the biological brain (McNaughton, 2006). One possibility to over-  
328 come such constraint was also discussed in the same paper (McNaughton,  
329 2006), with the solution to rely on multiple networks of conjunctive cells  
330 whose activity is dependent on the animal motion. On the other hand, slower  
331 mechanisms of synaptic matrix changes might compromise the efficacy of the  
332 model..

333 We have addressed the question of whether MEC layer II grid cell scale  
334 was determined by the network synaptic connectivity distribution, as pre-  
335 dicted by low-continuous attractor models, or whether intrinsic properties of  
336 stellate cells accounting for individual cell's hyperpolarization behavior was  
337 sufficient to modulate the rate-map resolution of explored environments. Our  
338 results suggest that biophysical grid-cell properties are responsible for their  
339 spatial scale.

340 Despite the computational evidence, it is still not clear, however, what  
341 are the mechanisms determining the differences in cells response along the  
342 dorsal-to-ventral axis level. During development, dorsal regions are formed  
343 earlier than the ones at ventral levels [29]. Similarly, as the animal's develop-  
344 ment advances, so does its spatial exploration, covering bigger regions of the  
345 environment. Thus, it is still uncertain as to what are the causal relation-  
346 ships between behavioral components of exploration, such as the magnitude  
347 of environmental exploration, and cellular development and organization. In  
348 this line, the work of [14] presented differences in the frequency of subthresh-  
349 old membrane potential oscillations in entorhinal cells. Moreover, in [13], the  
350 authors observed a modulation of the cell's spatial scale in nucleotide-gated  
351 (HCN) channels knockout mice compared to sham. Suggesting the functional  
352 role of HCN in mediating the topographic organization of firing fields in the  
353 explored environment.

354 Despite the fact that only excitatory cells are used in our implementa-  
355 tion, the low-continuous attractor mechanism defines the synaptic weight  
356 between cells accordingly to their Cartesian distance in the neural sheet in a  
357 range from strong excitation to neighboring cells to strong inhibition to fur-  
358 ther apart cells. Excitation and inhibition projections from the same neuron  
359 is definitely implausible in biological brains, however, that could be solved  
360 computationally by setting the synaptic weights to the excitatory range and  
361 adding a population of inhibitory interneurons mediating neuronal compe-

362 tition, as suggested by the E%-max winner-take-all mechanism of gamma  
363 frequencies (de Almeida et al., 2009)

364 Along those lines, our work proposes specific physiological and develop-  
365 mental questions that could be tested experimentally. Specifically, character-  
366 ization of the bursting behavior observed in entorhinal stellate cells along the  
367 dorsal-ventral axis, as well as optogenetic stimulation modulating the neu-  
368 ron's oscillatory dynamics could, potentially, support our modeling results.  
369 Moreover, at the computational level, this study proposes future work to un-  
370 veil the interactions between attractor dynamics and intrinsic properties of  
371 stellate cells in the MEC layer II.

## 372 Acknowledgments

373 *Funding* The research leading to these results has received funding from  
374 the European Research Council under the European Union's Seventh Frame-  
375 work Programme (FP7/20072013)/ERC grant agreement no (341196) cDAC.

## 376 References

- 377 [1] M. Fyhn, S. Molden, M. P. M. Witter, E. I. Moser, M.-B. Moser, Spa-  
378 tial representation in the entorhinal cortex., *Science* (New York, N.Y.)  
379 305 (August) (2004) 1258–64 (2004). doi:10.1126/science.1099901.
- 380 [2] T. Hafting, M. Fyhn, S. Molden, M.-B. Moser, E. I. Moser, Microstruc-  
381 ture of a spatial map in the entorhinal cortex., *Nature* 436 (7052) (2005)  
382 801–806 (2005). doi:10.1038/nature03721.
- 383 [3] N. M. van Strien, N. L. M. Cappaert, M. P. Witter, The anatomy of  
384 memory: an interactive overview of the parahippocampalhippocampal  
385 network, *Nature Reviews Neuroscience* 10 (4) (2009) 272–282 (2009).  
386 arXiv:9809069v1, doi:10.1038/nrn2614.
- 387 [4] E. I. Moser, Y. Roudi, M. P. Witter, C. Kentros, T. Bonhoeffer, M.-B.  
388 Moser, Grid cells and cortical representation, *Nature Reviews Neuro-*  
389 *science* 15 (7) (2014) 466–481 (2014). doi:10.1038/nrn3766.
- 390 [5] N. Burgess, C. Barry, J. O'Keefe, An oscillatory interference model  
391 of grid cell firing, *Hippocampus* 17 (9) (2007) 801–812 (2007).  
392 arXiv:NIHMS150003, doi:10.1002/hipo.20327.



- 393 [6] M. C. Fuhs, D. S. Touretzky, A spin glass model of path integration  
394 in rat medial entorhinal cortex, *Journal of Neuroscience* 26 (16) (2006)  
395 4266–4276 (2006). doi:10.1523/JNEUROSCI.4353-05.2006.
- 396 [7] B. L. McNaughton, F. P. Battaglia, O. Jensen, E. I. Moser, M. B. Moser,  
397 Path integration and the neural basis of the 'cognitive map', *Nat Rev*  
398 *Neurosci* 7 (8) (2006) 663–78 (2006). doi:10.1038/nrn1932.
- 399 [8] C. Domnisoru, A. A. Kinkhabwala, D. W. Tank, Membrane po-  
400 tential dynamics of grid cells, *Nature* (2013). arXiv:NIHMS150003,  
401 doi:10.1038/nature11973.
- 402 [9] K. Yoon, M. A. Buice, C. Barry, R. Hayman, N. Burgess, I. R. Fiete,  
403 Specific evidence of low-dimensional continuous attractor dynamics in  
404 grid cells, *Nature Neuroscience* (2013). doi:10.1038/nn.3450.
- 405 [10] V. H. Brun, T. Solstad, K. B. Kjelstrup, M. Fyhn, M. P. Witter, E. I.  
406 Moser, M.-B. Moser, Progressive increase in grid scale from dorsal to  
407 ventral medial entorhinal cortex, *Hippocampus* 18 (12) (2008) 1200–  
408 1212 (2008).
- 409 [11] H. Stensola, T. Stensola, T. Solstad, K. Frøland, M.-B. Moser, E. I.  
410 Moser, The entorhinal grid map is discretized., *Nature* 492 (7427) (2012)  
411 72–8 (2012). doi:10.1038/nature11649.
- 412 [12] D. Santos-Pata, R. Zucca, S. C. Low, P. F. M. J. Verschure, Size  
413 matters: How scaling affects the interaction between grid and border  
414 cells, *Frontiers in Computational Neuroscience* 11 (2017) 65 (2017).  
415 doi:10.3389/fncom.2017.00065.
- 416 [13] L. M. Giocomo, S. A. Hussaini, F. Zheng, E. R. Kandel, M. B. Moser,  
417 E. I. Moser, Grid cells use HCN1 channels for spatial scaling, *Cell* (2011).  
418 doi:10.1016/j.cell.2011.08.051.
- 419 [14] L. M. Giocomo, E. A. Zilli, E. Fransen, M. E. Hasselmo, Tem-  
420 poral Frequency of Subthreshold Oscillations Scales with Entorhi-  
421 nal Grid Cell Field Spacing, *Science* (2007). arXiv:NIHMS150003,  
422 doi:10.1126/science.1139207.
- 423 [15] L. M. Giocomo, M. E. Hasselmo, Time Constants of h Cur-  
424 rent in Layer II Stellate Cells Differ along the Dorsal to Ventral

- 425 Axis of Medial Entorhinal Cortex, *Journal of Neuroscience* (2008).  
426 doi:10.1523/JNEUROSCI.3196-08.2008.
- 427 [16] J. O’Keefe, N. Burgess, Dual phase and rate coding in hippocampal place  
428 cells: Theoretical significance and relationship to entorhinal grid cells,  
429 *Hippocampus* 15 (7) (2005) 853–866 (2005). doi:10.1002/hipo.20115.
- 430 [17] D. L. Garden, P. D. Dodson, C. O’Donnell, M. D. White, M. F. Nolan,  
431 Tuning of synaptic integration in the medial entorhinal cortex to the  
432 organization of grid cell firing fields, *Neuron* 60 (5) (2008) 875 – 889  
433 (2008). doi:<https://doi.org/10.1016/j.neuron.2008.10.044>.
- 434 [18] Z. Navratilova, L. M. Giocomo, J. M. Fellous, M. E. Hasselmo, B. L.  
435 McNaughton, Phase precession and variable spatial scaling in a peri-  
436 odic attractor map model of medial entorhinal grid cells with realis-  
437 tic after-spike dynamics, *Hippocampus* 22 (4) (2012) 772–789 (2012).  
438 doi:10.1002/hipo.20939.
- 439 [19] A. Guanella, P. Verschure, A Model of Grid Cells Based on a Path In-  
440 tegration Mechanism, *Artificial Neural Networks –ICANN 2006* (2006).  
441 doi:10.1007/11840817.
- 442 [20] S. Kunkel, A. Morrison, P. Weidel, J. M. Eppler, A. Sinha, W. Schenck,  
443 M. Schmidt, S. B. Vennemo, J. Jordan, A. Peyser, D. Plotnikov,  
444 S. Graber, T. Fardet, D. Terhorst, H. Mrk, G. Trenscher, A. Seeholzer,  
445 R. Deepu, J. Hahne, I. Blundell, T. Ippen, J. Schuecker, H. Bos, S. Diaz,  
446 E. Hagen, S. Mahmoudian, C. Bachmann, M. E. Lepperd, O. Bre-  
447 itwieser, B. Golosio, H. Rothe, H. Setareh, M. Djurfeldt, T. Schumann,  
448 A. Shusharin, J. Garrido, E. B. Muller, A. Rao, J. H. Vieites, H. E.  
449 Plesser, *Nest* 2.12.0 (Mar. 2017). doi:10.5281/zenodo.259534.  
450 URL <https://doi.org/10.5281/zenodo.259534>
- 451 [21] E. Jones, T. Oliphant, P. Peterson, et al., SciPy: Open source scientific  
452 tools for Python, [Online] (2001–).  
453 URL <http://www.scipy.org/>
- 454 [22] E. Izhikevich, Simple model of spiking neurons, *IEEE Transactions*  
455 *on Neural Networks* 14 (6) (2003) 1569–1572 (2003). arXiv:ArXiv,  
456 doi:10.1109/TNN.2003.820440.

- 457 [23] E. M. Izhikevich, *Dynamical systems in neuroscience*, MIT press, 2007  
458 (2007).
- 459 [24] B. G. Burton, M. N. Economo, G. J. Lee, J. A. White, Development of  
460 theta rhythmicity in entorhinal stellate cells of the juvenile rat, *Journal*  
461 *of neurophysiology* 100 (6) (2008) 3144–3157 (2008).
- 462 [25] F. Sargolini, M. Fyhn, T. Hafting, B. McNaughton, M. Witter,  
463 M. Moser, E. Moser, Conjunctive representation of position, direction,  
464 and velocity in entorhinal cortex, *Science* 312 (5774) (2006) 758–762  
465 (2006).
- 466 [26] D. Bush, N. Burgess, A Hybrid Oscillatory Interference/Continuous At-  
467 tractor Network Model of Grid Cell Firing, *Journal of Neuroscience*  
468 34 (14) (2014) 5065–5079 (2014). doi:10.1523/JNEUROSCI.4017-  
469 13.2014.
- 470 [27] M. E. Hasselmo, L. M. Giocomo, E. A. Zilli, Grid cell firing may  
471 arise from interference of theta frequency membrane potential oscilla-  
472 tions in single neurons, *Hippocampus* 17 (12) (2007) 1252–1271 (2007).  
473 doi:10.1002/hipo.20374.
- 474 [28] D. Derdikman, J. R. Whitlock, A. Tsao, M. Fyhn, T. Hafting, M.-B.  
475 Moser, E. I. Moser, Fragmentation of grid cell maps in a multicompart-  
476 ment environment, *Nature Neuroscience* (2009). doi:10.1038/nn.2396.
- 477 [29] B. Marcelin, Z. Liu, Y. Chen, A. S. Lewis, A. Becker, S. McClelland,  
478 D. M. Chetkovich, M. Migliore, T. Z. Baram, M. Esclapez, C. Bernard,  
479 Dorsoventral Differences in Intrinsic Properties in Developing CA1 Pyra-  
480 midal Cells, *Journal of Neuroscience* 32 (11) (2012) 3736–3747 (2012).  
481 doi:10.1523/JNEUROSCI.5870-11.2012.

482 **Supporting information**

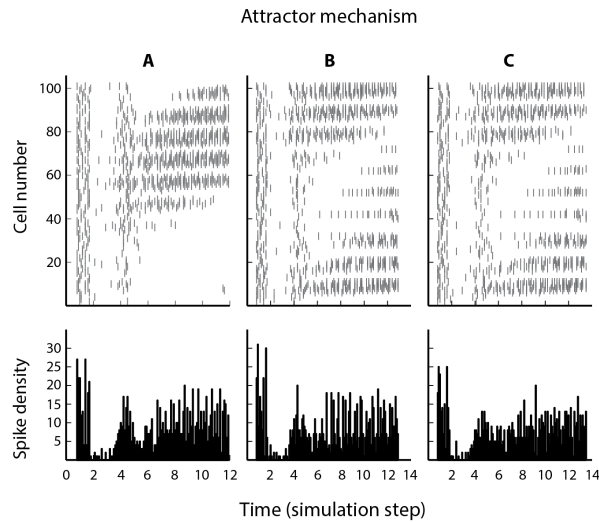

Figure S1: **Evidence of attraction at the simulation initial steps.** Every cell at each population (assemble) starts with random activity. The bump of activity is formed and attracted to a set of cells. A, B and C represents activity from population 1, 10 and 19, respectively.

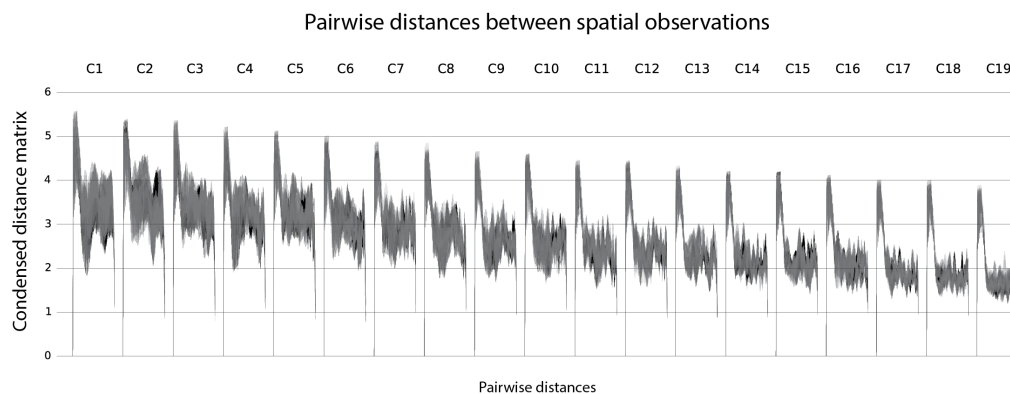

Figure S2: **Pairwise distances between spatial observations.** Gaussian kernel sigma of firing fields for ten cells at each condition is shown. Decrease of condensed distance matrix against pairwise distances from ventral (left) to dorsal (right) conditions.
